# Supplementary material for: Parameterizing the instrumental spectral response function and its changes by a super-Gaussian and its derivatives
Source: Copernicus journal article supplement (doi:10.5194/amt-10-581-2017), 2017-02-23
Supplement: Supplementary file 1 [file amt-10-581-2017-supplement.zip]

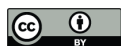

## *Supplement of*

# **Parameterizing the instrumental spectral response function and its changes by a super-Gaussian and its derivatives**

**Steffen Beirle et al.**

*Correspondence to:* Steffen Beirle ([steffen.beirle@mpic.de](mailto:steffen.beirle@mpic.de))

- [amt-10-581-2017-supplement-title-page.pdf](#)
- [Avantes\\_sample\\_meas.dat](#)

The copyright of individual parts of the supplement might differ from the CC-BY 3.0 licence.
